# Supplementary material for: Actin Cytoskeleton Polymerization and Focal Adhesion as Important Factors in the Pathomechanism and Potential Targets of Mucopolysaccharidosis Treatment
Source: MDPI journal article supplement (doi:10.3390/cells12131782), 2023-07-05
Supplement: s1 [file s1]

# Supplementary Material

## for

### “Actin Cytoskeleton Polymerization and Focal Adhesion as Important Factors in the Pathomechanism and Potential Targets for Mucopolysaccharidosis Treatment”

**Figure S1.** F-actin abundance in cells incubated in the presence of genistein or appropriate enzyme. Investigated lines of fibroblasts were incubated for 24 h and stained with CellMask™ Green Actin Tracking Stain. Panel A demonstrate representative micrographs of treated control lines and MPS cells. Panels B and C show quantitative analysis from 100 randomly chosen cells (10,000 events). Error bars represent standard deviation of three independent repetitions of a given experiment. Statistical analysis was performed using one-way ANOVA test. Differences were considered statistically significant relative to the control cell line (\*) or untreated MPS I or MPS II (#) when  $p < 0.05$ .

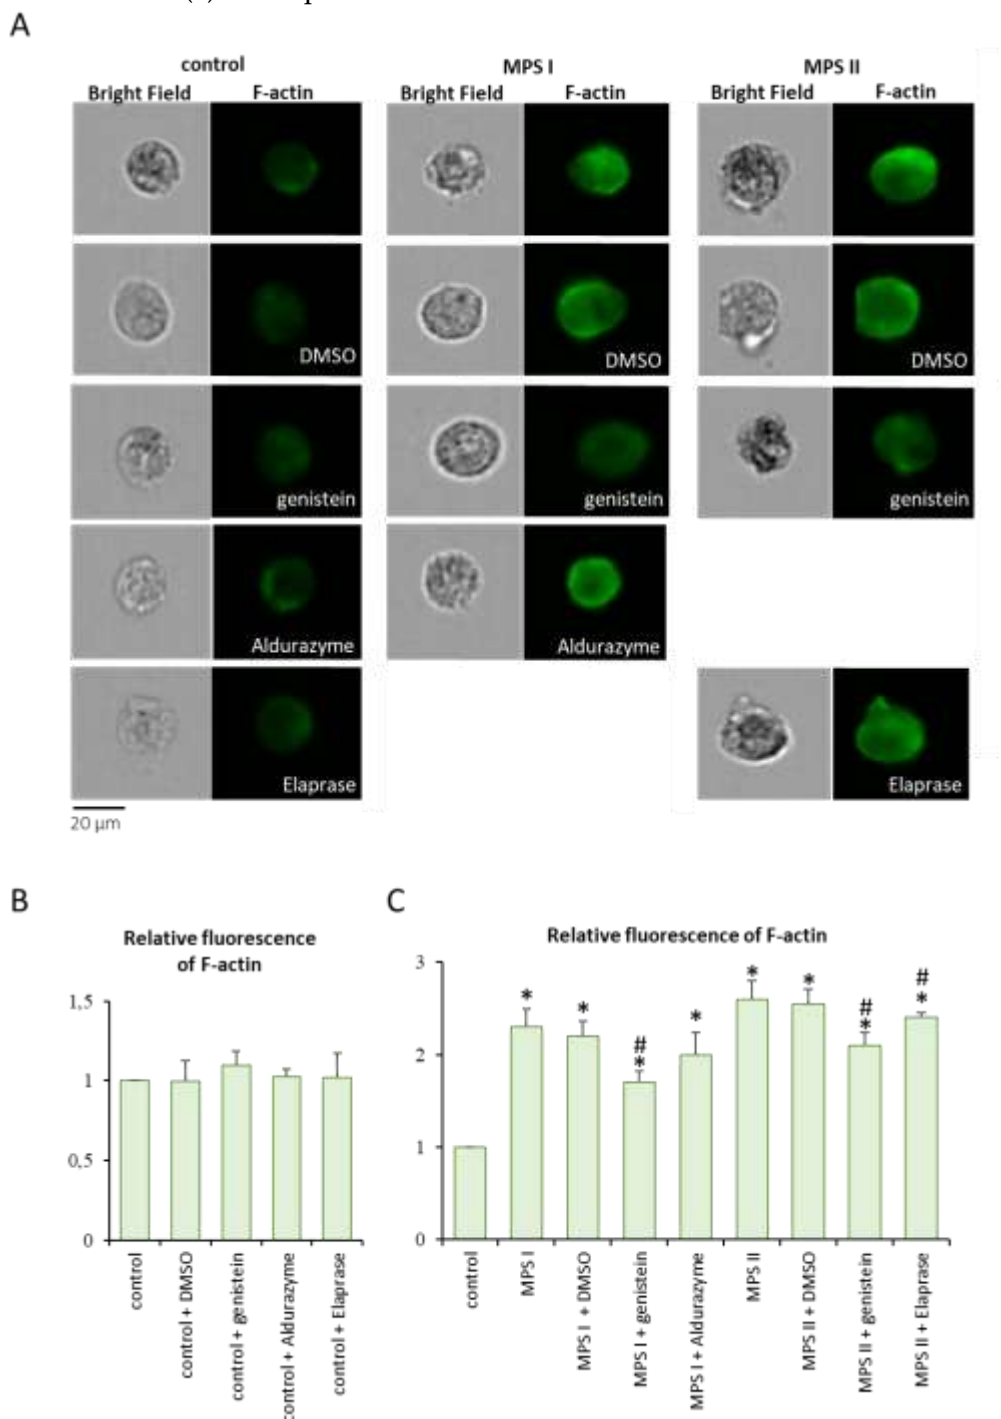

**Table S1.** Characteristics of MPS patients’ derived fibroblast used for transcriptomic analysis.

| Cell Line | Sex *  | Age<br>*# | Mutated Gene and Its<br>Locus * | Mutation *      |               |          |           |
|-----------|--------|-----------|---------------------------------|-----------------|---------------|----------|-----------|
|           |        |           |                                 | Allele 1        |               | Allele 2 |           |
|           |        |           |                                 | DNA             | Protein       | DNA      | Protein   |
| MPS I     | Female | 1         | <i>IDUA</i> , 4p16.3            | G1293A          | Trp402X       | G1293A   | Trp402X   |
| MPS II    | Male   | 3         | <i>IDS</i> , Xp28               | 208insC         | His70ProfsX29 | none     | none      |
| MPS IIIA  | Female | 3         | <i>SGSH</i> , 17q25.3           | G1351A          | Glu447Lys     | G746A    | Arg245His |
| MPS IIIB  | Male   | 7         | <i>NAGLU</i> , 17q21            | C1876T          | Arg626X       | C1876T   | Arg626X   |
| MPS IIIC  | Male   | 8         | <i>HGSNAT</i> , 8p11.1          | ND              | ND            | ND       | ND        |
| MPS IIID  | Male   | 7         | <i>GNS</i> , 12q14              | C1063T          | Arg355X       | C1063T   | Arg355X   |
| MPS IVA   | Female | 7         | <i>GALNS</i> , 16q24.3          | ND              | ND            | ND       | ND        |
| MPS IVB   | Female | 4         | <i>GLB1</i> , 3p22.3            | TG851-<br>852CT | Trp273Leu     | G1561T   | Trp509Cys |
| MPS VI    | Female | 3         | <i>ARSB</i> , 4q14.1            | ND              | ND            | ND       | ND        |
| MPS VII   | Male   | 3         | <i>GUSB</i> , 7q21.11           | G1881T          | Trp627Cys     | G1068A   | Arg356X   |
| MPS IX    | Female | 14        | <i>HYAL1</i> , 3p.21.3          | ND              | ND            | ND       | ND        |

\* According to cell line description in Coriell Institute; #age (years) at the time of cell collection; ND = not determined.

**Table S2.**Number of up-and down-regulated transcripts (at FDR<0.1;*p*<0.1) of gene included into Actin filament-based process (GO:0030029) term in cells of different MPS type relative to control cells (HDFa).

| No. of transcripts with altered expression in particular MPS type vs HDFa line |    |    |      |      |      |      |     |     |    |     |    |
|--------------------------------------------------------------------------------|----|----|------|------|------|------|-----|-----|----|-----|----|
| MPS type:                                                                      | I  | II | IIIA | IIIB | IIIC | IIID | IVA | IVB | VI | VII | IX |
| up-regulated                                                                   | 23 | 13 | 27   | 29   | 21   | 18   | 17  | 22  | 12 | 34  | 18 |
| down-regulated                                                                 | 7  | 6  | 13   | 13   | 13   | 3    | 5   | 18  | 4  | 8   | 12 |
| total                                                                          | 30 | 19 | 40   | 42   | 34   | 21   | 22  | 48  | 16 | 42  | 30 |
